# Supplementary material
Source: PubMed Central journal article supplement (PMC263843)

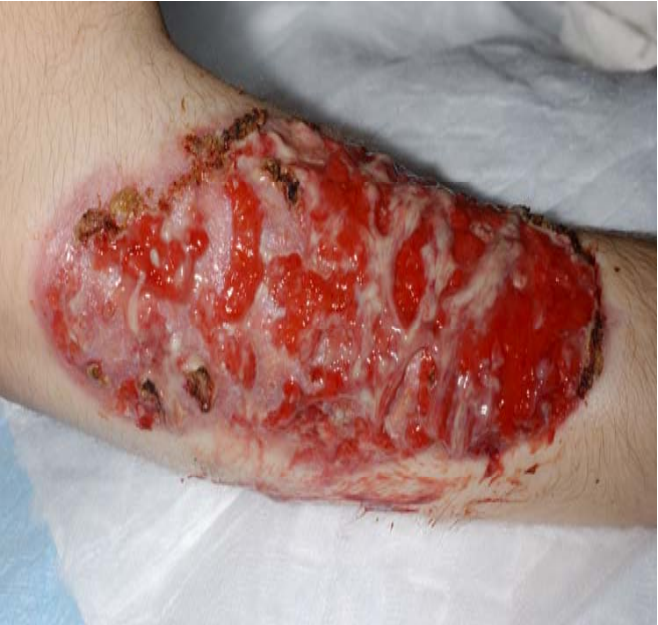

Supplement: pnas_100_23_13501__11.pdf [file pnas_100_23_13501__11.pdf]

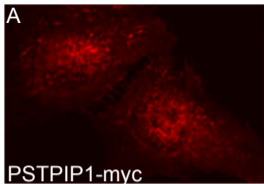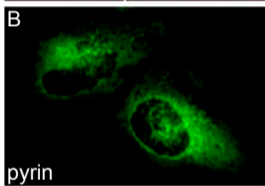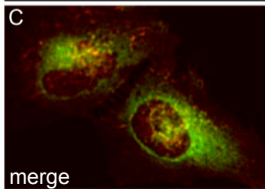

Supplement: pnas_100_23_13501__3.pdf [file pnas_100_23_13501__3.pdf]

monocytes

granulocytes

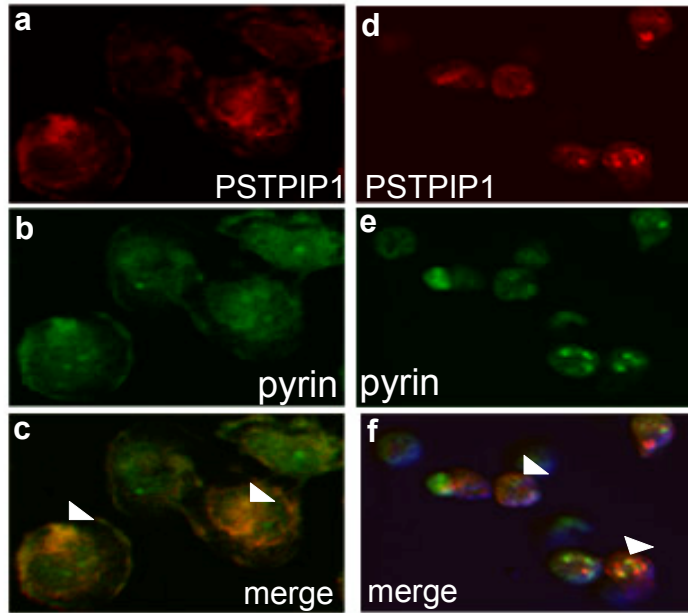

Supplement: pnas_100_23_13501__5.pdf [file pnas_100_23_13501__5.pdf]

|             |   |   |
|-------------|---|---|
| Vector      | + |   |
| GFP-BBCC    | + | + |
| PSTPIP1-myc |   | + |

IP: anti myc  
Blot: anti-GFP

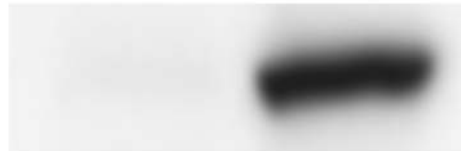

Expression

anti-GFP

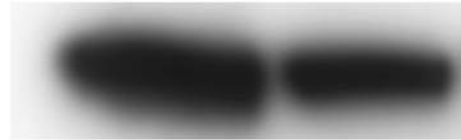

anti-myc

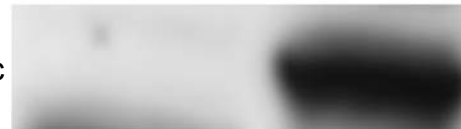

Supplement: pnas_100_23_13501__7.pdf [file pnas_100_23_13501__7.pdf]

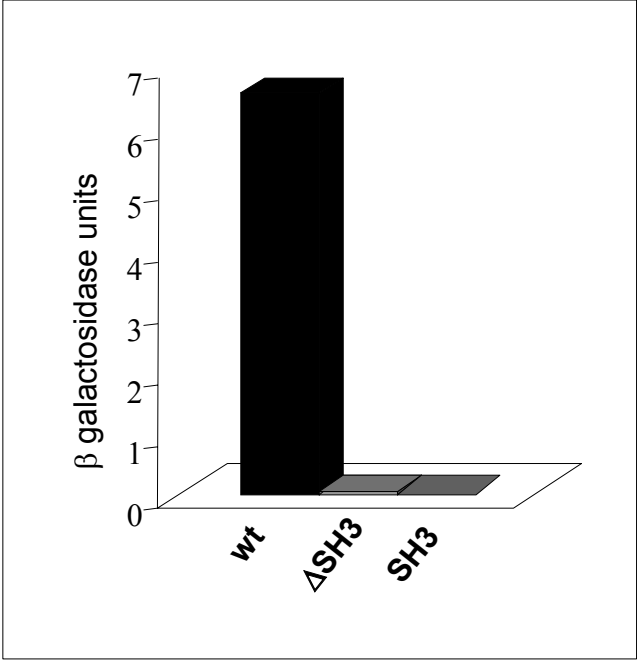

Supplement: pnas_100_23_13501__9.pdf [file pnas_100_23_13501__9.pdf]
